# Supplementary material for: Electricity savings and greenhouse gas emission reductions from global phase-down of hydrofluorocarbons
Source: Copernicus journal article supplement (doi:10.5194/acp-20-11305-2020), 2020-10-05
Supplement: Supplementary file 1 [file acp-20-11305-2020-supplement.zip]

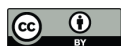

*Supplement of*

## **Electricity savings and greenhouse gas emission reductions from global phase-down of hydrofluorocarbons**

**Pallav Purohit et al.**

*Correspondence to:* Pallav Purohit ([purohit@iiasa.ac.at](mailto:purohit@iiasa.ac.at))

- [acp-20-11305-2020-supplement-title-page.pdf](#)
- [acp-2020-193-supplement-version4.pdf](#)
- [acp-2020-193-supplement.xlsx](#)

The copyright of individual parts of the supplement might differ from the CC BY 4.0 License.
